# Supplementary material
Source: Elsevier journal article supplement (https://comptes-rendus.academie-sciences.fr/chimie/article/10.1016/j.crci.2008.06.020/file/attach/mmc4.pdf)
Supplement: mmc4 [file mmc4.pdf]

#### Supporting Information 4 (Oliveira et al.)

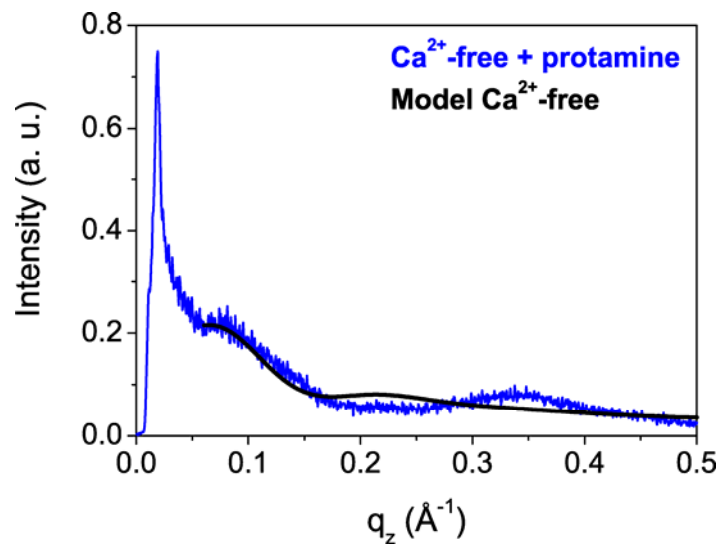

GIXOS curve and the reconstructed electron density profile of the LPS Ra monolayer on Ca<sup>2+</sup>-free buffer after the protamine injection (blue). The measured curve can not be represented by any slab model. Such as the best-fit model of the same monolayer without protamine (black), indicating that the layered structures of the film were completely disrupted.
